# Supplementary material
Source: HighWire-hosted journal article supplement (https://heart.bmj.com/content/106/21/1629)
Supplement: inline-supplementary-material-1 [file inline-supplementary-material-1.pdf]

**Supplementary Table 1. Studies evaluating RV dysfunction in sepsis and septic shock**

| Author/Year                     | N   | Inclusion                              | Modality | Timing   | RVD definition                                                                                                                   | RVD%                                                                       | Outcome                                                                                                                                                                         |
|---------------------------------|-----|----------------------------------------|----------|----------|----------------------------------------------------------------------------------------------------------------------------------|----------------------------------------------------------------------------|---------------------------------------------------------------------------------------------------------------------------------------------------------------------------------|
| Mokart 2007 <sup>1</sup>        | 45  | Septic shock                           | TTE      | Q1D      | Septal dyskinesia + RV dilation (RVEDD > 30mm PSLAX) or RV size > LV size. RV dilation + PASP > 45 mm Hg all for > 48 hours      | 38.0%                                                                      | RV dysfunction was associated with increased ICU mortality                                                                                                                      |
| Tongyoo 2011 <sup>2</sup>       | 118 | Severe sepsis and septic shock         | PAC      | 24 h     | RAP > 12 mmHg, mPAP > 30 mm Hg, PVR > 250 dyne/sec/cm-5 and PAOP < 18 mm Hg                                                      | 17.8%                                                                      | RV dysfunction not associated with increased 28 day mortality                                                                                                                   |
| Furian 2012 <sup>3</sup>        | 45  | Severe sepsis and septic shock         | TTE      | 24 h     | TASV $\leq$ 12cm/sec, LVEF < 55% and LV S' < 12cm/sec                                                                            | 30.0%                                                                      | RV dysfunction not associated with increased in hospital day mortality                                                                                                          |
| <b>Pulido 2012<sup>4*</sup></b> | 106 | Severe sepsis and septic shock         | TTE      | 24 h     | TASV < 15, RV-LV size, RV wall motion, expert opinion                                                                            | 31.0%<br>Isolated<br>RVD (9%)                                              | RV dysfunction not associated with increased 30 day or 1 year mortality                                                                                                         |
| Harmankaya 2013 <sup>5</sup>    | 55  | Sepsis, severe sepsis and septic shock | TEE      | 4 h      | TASV, RV- MPI                                                                                                                    | ---                                                                        | RV s' was lower and RV- MPI higher in non survivors compared to survivors and control                                                                                           |
| Papanikolaou 2014 <sup>6</sup>  | 42  | Severe sepsis and septic shock         | PAC      | Days 1-3 | RVEF < 40%                                                                                                                       | 78.0%                                                                      | Reduced RVEF associated with higher 28 day mortality                                                                                                                            |
| <b>Orde 2014<sup>7*</sup></b>   | 60  | Severe sepsis and septic shock         | TTE      | 24 h     | TAPSE < 16, FAC < 35%, TASV < 10, RV dilation, RV reduced systolic function<br><br>Speckle tracking < -21%, -13 to -21 and > -13 | 32.0%<br>Isolated<br>RVD (15%)<br><br>72.0%<br>Isolated<br>RVD<br>(25.77%) | RV dysfunction via routine echo parameters not associated with increased 30 day or 1 year mortality.<br><br>RV dysfunction via strain imaging associated with 6 month mortality |

|                                           |     |                                |     |      |                                                                                                            |                                |                                                                                     |
|-------------------------------------------|-----|--------------------------------|-----|------|------------------------------------------------------------------------------------------------------------|--------------------------------|-------------------------------------------------------------------------------------|
| Landesberg 2014 <sup>8</sup>              | 106 | Severe sepsis and septic shock | TTE | 24 h | RVEDi, RVESVi, RVSVi/RVEF - 3D volumes, speckle tracking, Long and circumferential strain                  | ---                            | Higher RVEDVi associated with increased in hospital mortality                       |
| Singh 2016 <sup>9</sup>                   | 88  | Septic shock                   | TTE | 24 h | Any abnormality in chamber dimensions, TAPSE, PD MPI, MPI, FAC abnormality based on 2010 ASE RV guidelines | 79.0%                          | Lower FAC associated with increased 28 day mortality                                |
| <b>Vallabhajosyula 2017<sup>10*</sup></b> | 388 | Severe sepsis and septic shock | TTE | 72 h | TAPSE < 16, FAC < 35%, TASV <15, RV dilation, RV reduced systolic or diastolic function                    | 55.0%<br>Isolated RVD (25.77%) | 1 year mortality higher in isolated RV dysfunction                                  |
| Cirulis 2018 <sup>11</sup>                | 146 | Severe sepsis and septic shock | TTE | 48 h | RVEDD/LVEDD ≥ 0.9                                                                                          | 66.0%                          | RV dysfunction not associated with increased 30 day mortality                       |
| Geri 2019 <sup>12</sup>                   | 360 | Septic shock                   | TEE | 12 h | RVEDA/LVEDA > 0.6                                                                                          | 22.5%                          | ---                                                                                 |
| Main 2019 <sup>13</sup>                   | 56  | Sepsis                         | TTE | ---  | TAPSE < 16 cm                                                                                              | ---                            | Increased RV basal and Mid dimension was associated with increased 90 day mortality |
| Winkelhorst 2019 <sup>14</sup>            | 98  | Severe sepsis and septic shock | PAC | 24 h | RVEF < 20%                                                                                                 | 21.4%                          | RVEF < 20% associated with increased 1 year mortality                               |
| Kim J 2020 <sup>15</sup>                  | 778 | Septic shock                   | TTE | 72 h | TAPSE < 16, , TASV <15, RV dilation, RV reduced systolic function                                          | 14.4%                          | RV dysfunction was associated with increased 28 mortality                           |

**Legend: \*are studies where proportions of patient with isolated RV dysfunction was stated.**

**Abbreviations:** FAC: Fractional area change; LV: Left ventricle; LVEF: Left ventricle ejection fraction; LVEDA: Left Ventricle end diastolic area; LVEDD: Left Ventricle end diastolic dimension; LV S': Left ventricle annular systolic velocity; mPAP: Mean pulmonary artery pressure; PAOP: Pulmonary artery occlusion pressure; PASP: Pulmonary artery systolic pressure; PVR: Pulmonary Vascular Resistance; RAP: Right atrial pressure; RV: Right Ventricle; RVEDA: Right Ventricle end diastolic area; RVEDi: Right Ventricle end diastolic index; RVESVi: Right

Ventricle end systolic index; RSVi: Right ventricle stroke volume index; RVEF: Right ventricle ejection fraction;  
RV- MPI: Right Ventricle Myocardial performance index; RVEDD: Right Ventricle end diastolic dimension;  
TAPSE: Tricuspid annular plane systolic excursion; TASV: Tricuspid annular systolic velocity.

## REFERENCES

1. Mokart D, Sannini A, Brun J-P, et al. N-terminal pro-brain natriuretic peptide as an early prognostic factor in cancer patients developing septic shock. *Crit Care*. 2007;11(2):R37. doi:10.1186/cc5721
2. Tongyoo S, Permpikul C, Lertsawangwong S, et al. Right Ventricular Dysfunction in Septic Shock. 2011;94:8.
3. Furian T, Aguiar C, Prado K, et al. Ventricular dysfunction and dilation in severe sepsis and septic shock: Relation to endothelial function and mortality. *J Crit Care*. 2012;27(3):319.e9-319.e15. doi:10.1016/j.jcrc.2011.06.017
4. Pulido JN, Afessa B, Masaki M, et al. Clinical Spectrum, Frequency, and Significance of Myocardial Dysfunction in Severe Sepsis and Septic Shock. *Mayo Clin Proc*. 2012;87(7):620-628. doi:10.1016/j.mayocp.2012.01.018
5. Harmankaya A, Akilli H, Gul M, et al. Assessment of right ventricular functions in patients with sepsis, severe sepsis and septic shock and its prognostic importance: A tissue Doppler study. *J Crit Care*. 2013;28(6):1111.e7-1111.e11. doi:10.1016/j.jcrc.2013.07.059
6. Papanikolaou J, Makris D, Mpaka M, Palli E, Zygoulis P, Zakynthinos E. New insights into the mechanisms involved in B-type natriuretic peptide elevation and its prognostic value in septic patients. *Crit Care*. 2014;18(3):R94. doi:10.1186/cc13864
7. Orde SR, Pulido JN, Masaki M, et al. Outcome prediction in sepsis: Speckle tracking echocardiography based assessment of myocardial function. *Crit Care*. 2014;18(4):R149. doi:10.1186/cc13987
8. Landesberg G, Jaffe AS, Gilon D, et al. Troponin Elevation in Severe Sepsis and Septic Shock: The Role of Left Ventricular Diastolic Dysfunction and Right Ventricular Dilatation\*. *Crit Care Med*. 2014;42(4):790-800. doi:10.1097/CCM.000000000000107
9. Singh RK, Kumar S, Nadig S, et al. Right heart in septic shock: prospective observational study. *J Intensive Care*. 2016;4(1). doi:10.1186/s40560-016-0159-y
10. Vallabhajosyula S, Kumar M, Pandompatam G, et al. Prognostic impact of isolated right ventricular dysfunction in sepsis and septic shock: an 8-year historical cohort study. *Ann Intensive Care*. 2017;7(1). doi:10.1186/s13613-017-0319-9
11. Cirulis MM, Huston JH, Sardar P, et al. Right-to-left ventricular end diastolic diameter ratio in severe sepsis and septic shock. *J Crit Care*. 2018;48:307-310. doi:10.1016/j.jcrc.2018.09.025
12. Geri G, Vignon P, Aubry A, et al. Cardiovascular clusters in septic shock combining clinical and echocardiographic parameters: a post hoc analysis. *Intensive Care Med*. 2019;45(5):657-667. doi:10.1007/s00134-019-05596-z
13. Main AB, Braham R, Campbell D, Inglis AJ, McLean A, Orde S. Subcostal TAPSE: a retrospective analysis of a novel right ventricle function assessment method from the subcostal position in patients with sepsis. *Ultrasound J*. 2019;11(1). doi:10.1186/s13089-019-0134-7
14. Winkelhorst JC, Bootsma IT, Koetsier PM, de Lange F, Boerma EC. Right Ventricular Function and Long-Term Outcome in Sepsis: A Retrospective Cohort Study. *SHOCK*. 2020;53(5):537-543. doi:10.1097/SHK.0000000000001413
15. Kim J-S, Kim Y-J, Kim M, Ryoo SM, Kim WY. The association between right ventricle dysfunction and poor outcome in patients with septic shock. *Heart*. heartjnl-2020-316889.
